# Supplementary material
Source: PubMed Central journal article supplement (PMC5808943)
Supplement: NIHMS934651-supplement-Roeder_BiochBiophResCom_Suppl_Fig1.pdf [file NIHMS934651-supplement-Roeder_BiochBiophResCom_Suppl_Fig1.pdf]

# Supplementary figure 1

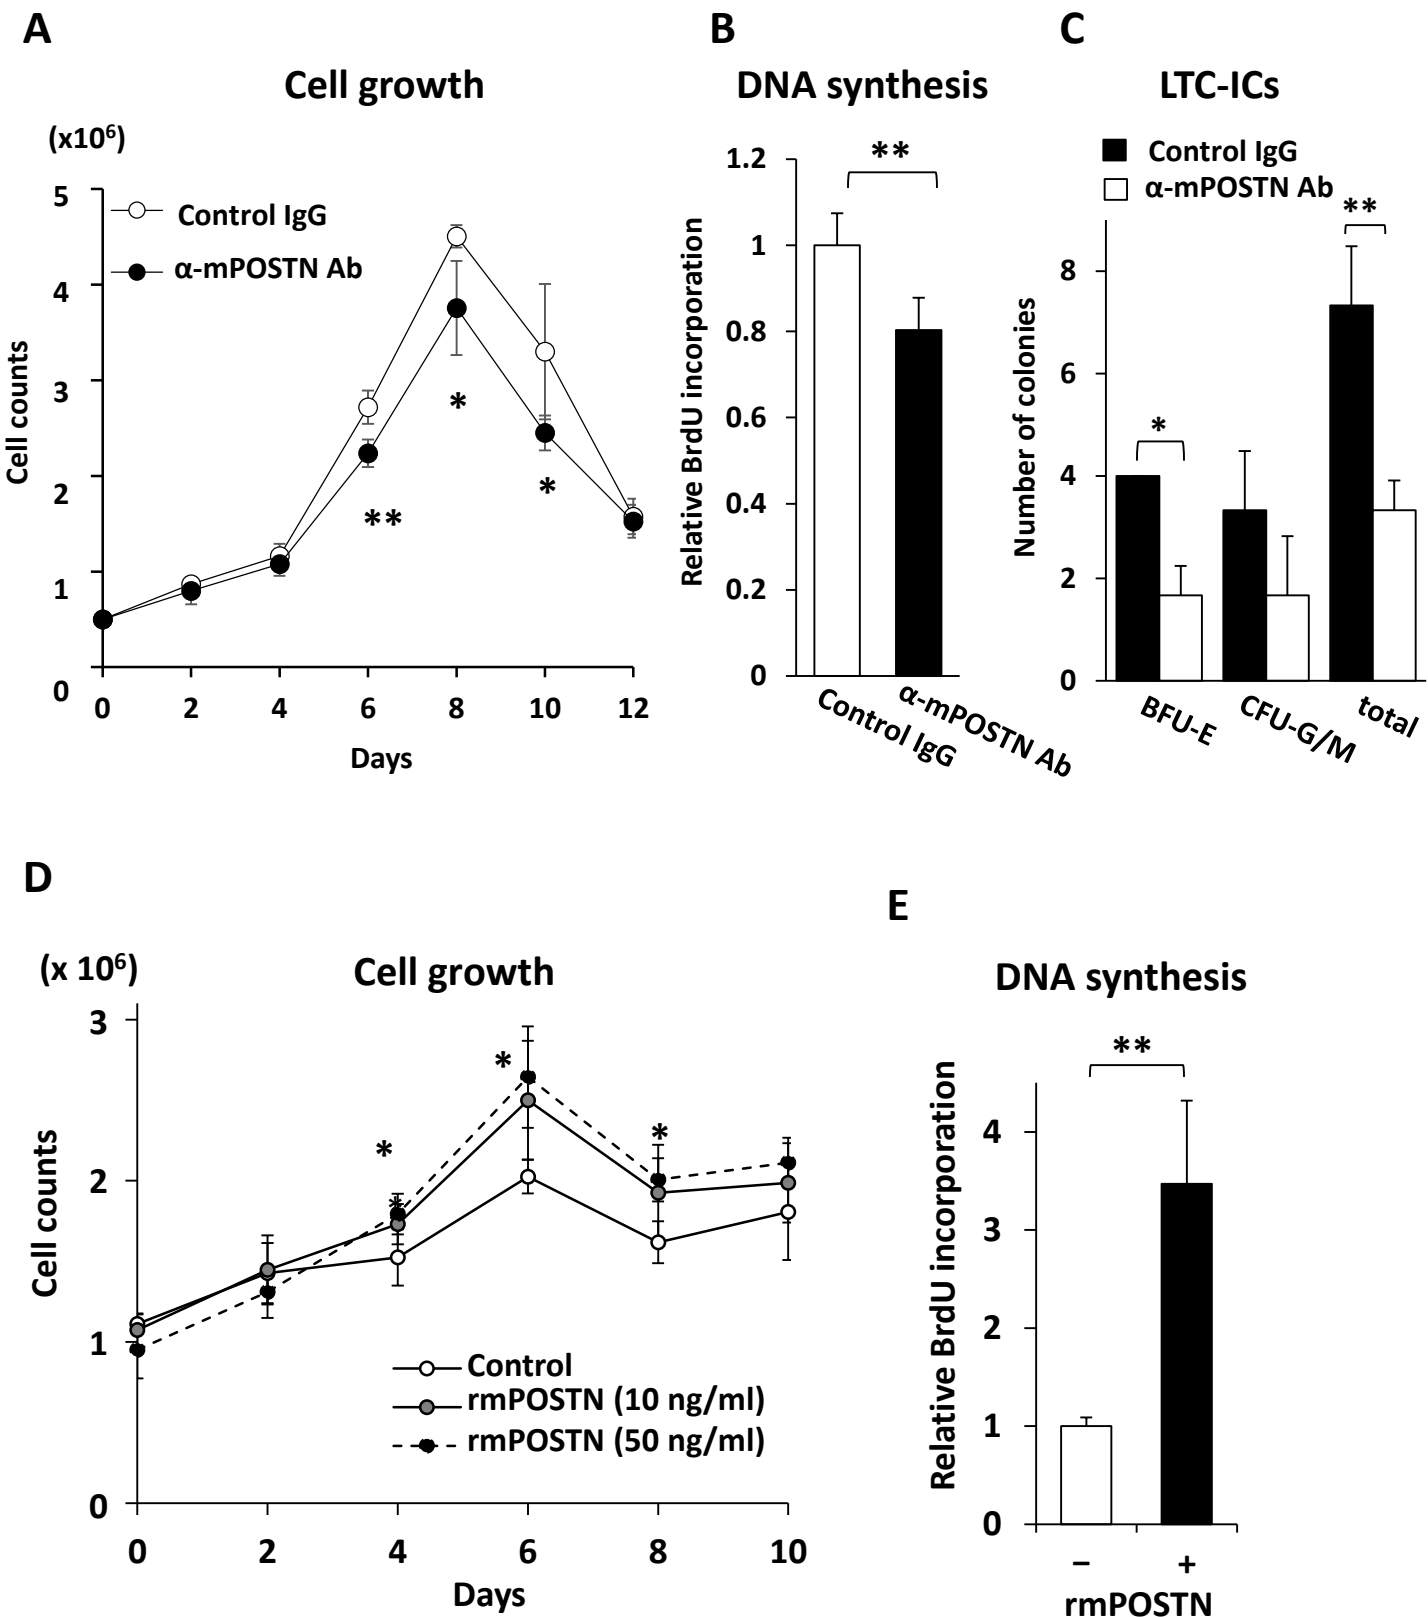

**Supplementary Fig. 1.** POSTN promotes BM cell growth and HPCs support on BM stromal cells. (A, B, C) The number (A) and DNA synthesis measured by BrdU incorporation (B) of BM cells, and LTC-ICs (C), when cocultured on OP-9 cells, decreased in the presence of anti-mPOSTN Ab.  $\alpha$ , anti. (D, E) The number (D) and DNA synthesis (E) of BM cells, when cocultured with MS-5 cells, increased in the presence of rmPOSTN. 10 ng/ml POSTN was added in (E). N = 4 (A, B, D, E), or 3 (C). \*,  $P < 0.05$ ; \*\*,  $P < 0.01$ .
