# Supplementary material
Source: PubMed Central journal article supplement (PMC5808943)
Supplement: NIHMS934651-supplement-Roeder_BiochBiophResCom_Suppl_Fig2.pdf [file NIHMS934651-supplement-Roeder_BiochBiophResCom_Suppl_Fig2.pdf]

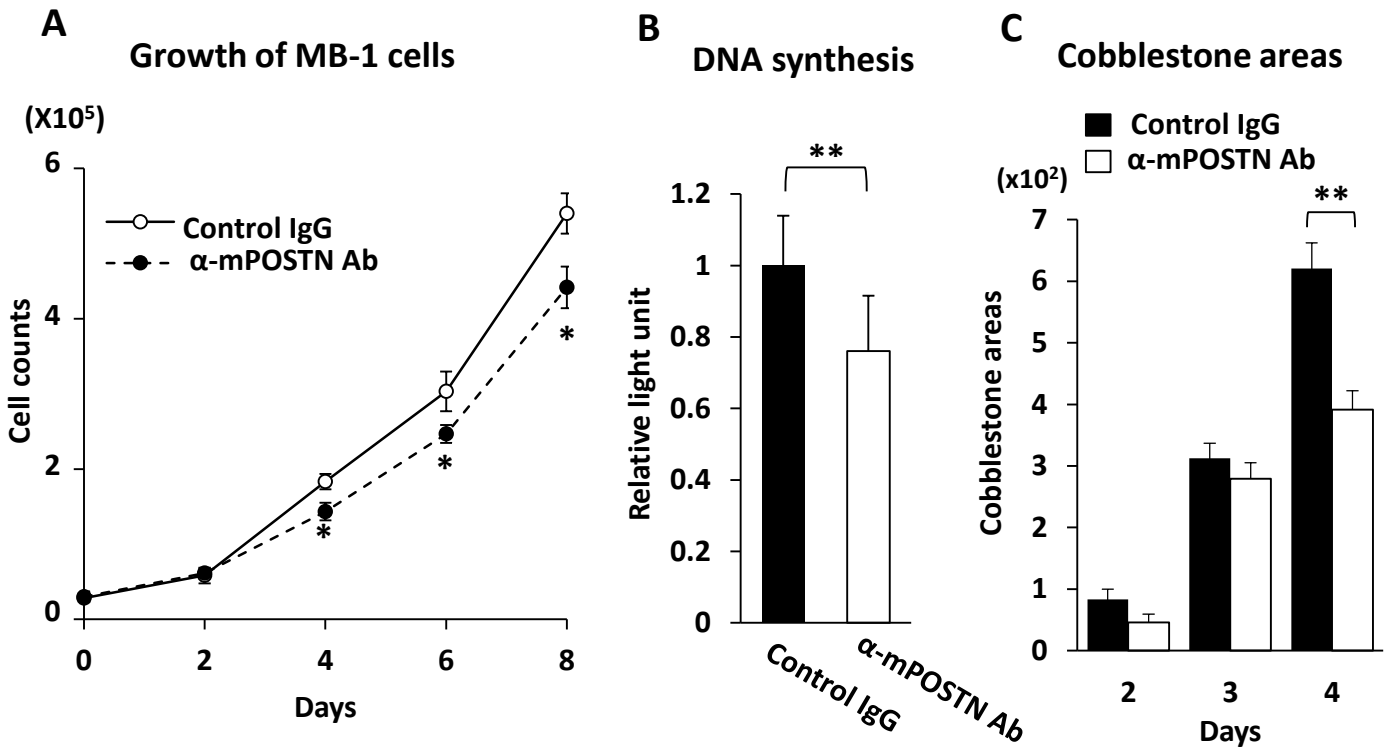

**Supplementary Fig. 2.** OP-9 cell POSTIN supports MB-1 niche-dependent myeloblastoma cells. (A, B) The number (A) and DNA synthesis (B) of MB-1 cells cocultured with OP-9 cells decreased in the presence of anti-mPOSTN Ab. (C) The number of cobblestone areas per visual field, formed by MB-1 cells cocultured with OP-9 cells, decreased in the presence of anti-mPOSTN Ab. N = 3 (A), 8 (B), or 4 (C). \*,  $P < 0.05$ ; \*\*,  $P < 0.01$ .
