# Supplementary material
Source: PubMed Central journal article supplement (PMC5808943)
Supplement: NIHMS934651-supplement-Roeder_BiochBiophResCom_Suppl_Fig3.pdf [file NIHMS934651-supplement-Roeder_BiochBiophResCom_Suppl_Fig3.pdf]

A

## ELISA (cell extract)

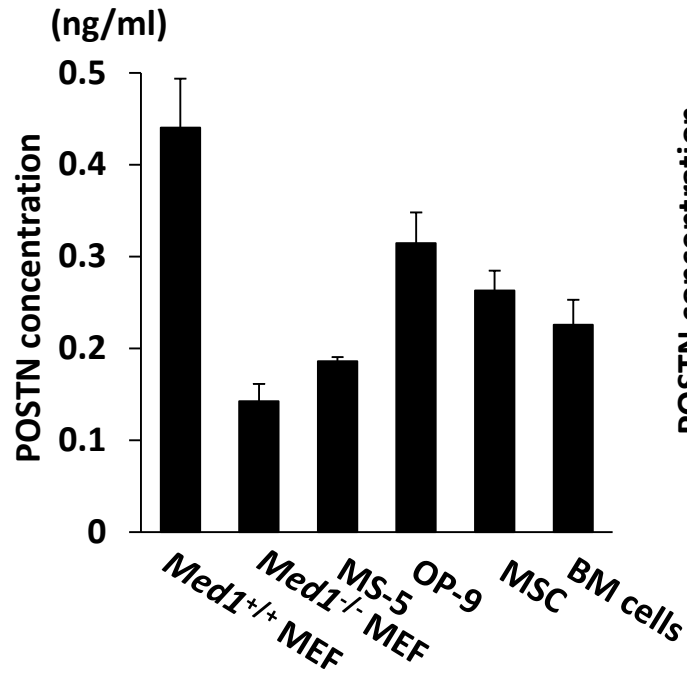

B

## ELISA (cell extract)

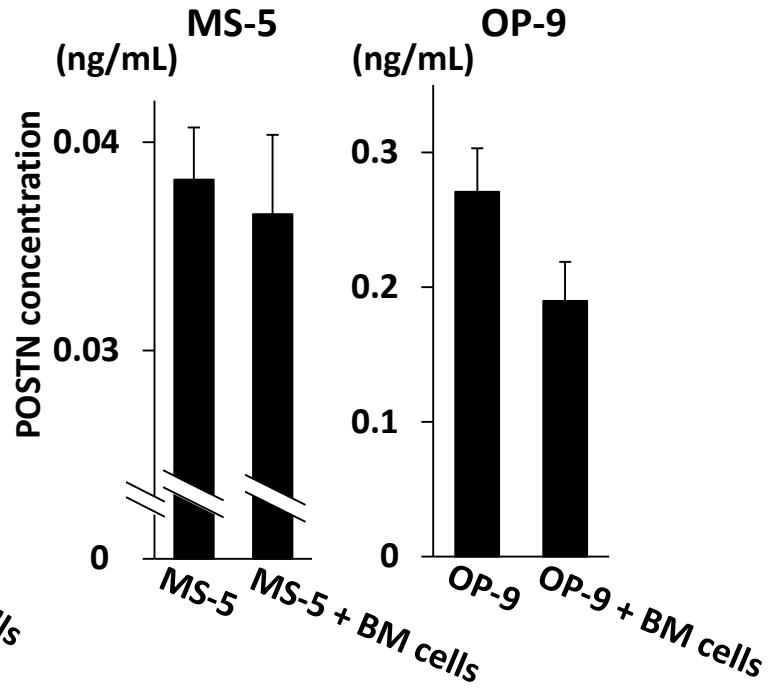**Supplementary Fig. 3.** Cell-associated mPOSTIN in various mesenchymal cells and BM cells.

POSTN concentrations of whole cell extracts, obtained by sonicating cells in a buffer (100 mM KCl, 0.05 % NP-40, 10 mM Tris-HCl pH 7.9 (at 4 ° C), 0.25 mM EDTA, and 10 % glycerol) and normalized by protein concentrations (420 µg/ml (A) and 284 µg/ml (B)) were measured by ELISA. The values were subtracted from the ELISA value of human 293T cell extract as the background.

(A) Various cells had variable levels of cell-associated POSTN.

(B) MS-5 or PO-9 cell-associated POSTN was not induced by physical attachment with BM cells.

N = 3.
