# Supplementary material
Source: PubMed Central journal article supplement (PMC5808943)
Supplement: NIHMS934651-supplement-Roeder_BiochBiophResCom_Suppl_Fig4.pdf [file NIHMS934651-supplement-Roeder_BiochBiophResCom_Suppl_Fig4.pdf]

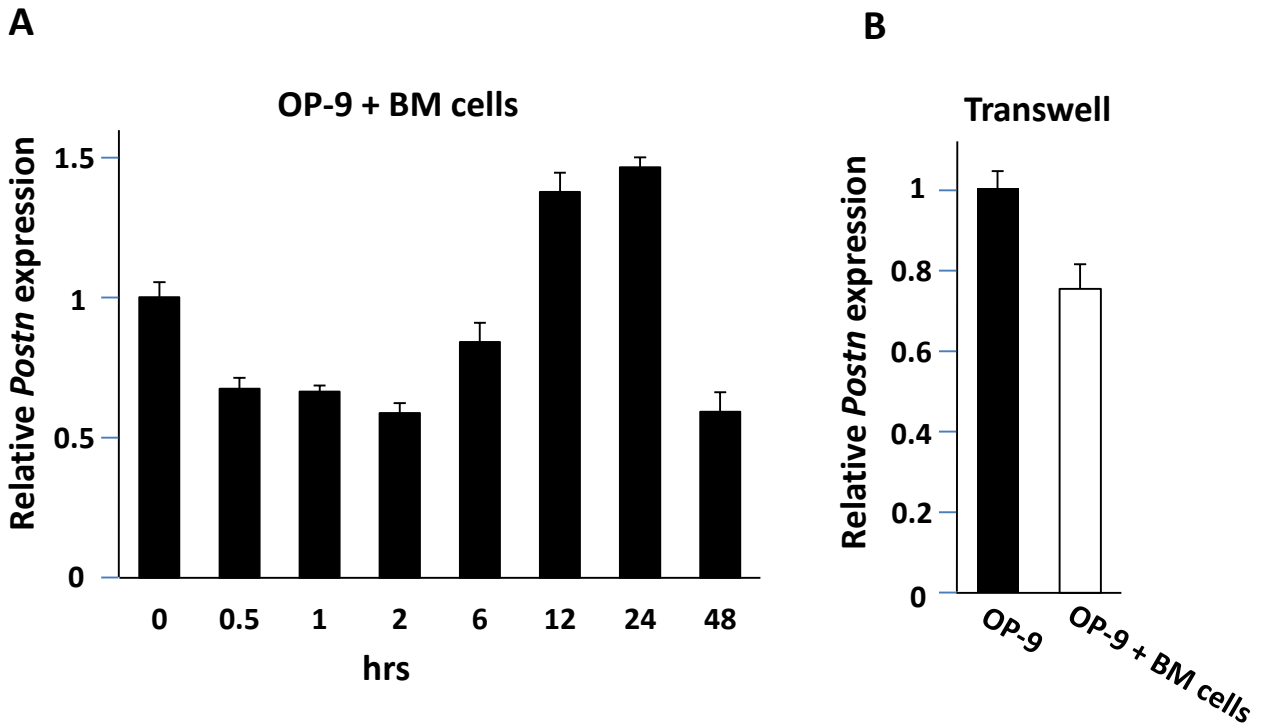

**Supplementary Fig. 4.** Induction of OP-9 cell *Postn* is dependent on physical interaction with BM cells.

(A, B) Quantitative PCR. OP-9 cell *Postn* mRNA was initially downregulated and then induced when cocultured with BM cells (A). When cocultured for 24 h in transwells to inhibit direct contact between BM cells and OP-9 cells, *Postn* mRNA was not induced (B).

N = 3.
